# Supplementary material for: Emplacement of “exotic” Zechstein slivers along the inverted Sontra Graben (northern Hessen, Germany): clues from balanced cross sections and geometrical forward modeling
Source: Copernicus journal article supplement (doi:10.5194/se-12-1005-2021), 2021-04-30
Supplement: Supplementary file 1 [file se-12-1005-2021-supplement.zip]

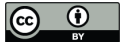

*Supplement of*

**Emplacement of “exotic” Zechstein slivers along the inverted Sontra Graben (northern Hessen, Germany): clues from balanced cross sections and geometrical forward modeling**

**Jakob Bolz and Jonas Kley**

*Correspondence to:* Jonas Kley ([jonas.kley@geo.uni-goettingen.de](mailto:jonas.kley@geo.uni-goettingen.de))

- [se-12-1005-2021-supplement-title-page.pdf](#)
- [DipData.csv](#)

The copyright of individual parts of the supplement might differ from the article licence.
