# Supplementary material for: Emplacement of “exotic” Zechstein slivers along the inverted Sontra Graben (northern Hessen, Germany): clues from balanced cross sections and geometrical forward modeling
Source: Copernicus journal article supplement (doi:10.5194/se-12-1005-2021), 2021-04-30
Supplement: Supplementary file 2 [file se-12-1005-2021-supplement.zip]

Archive with 2 entries (2 files):
- se-12-1005-2021-supplement-title-page.pdf
- DipData.csv
