# Supplementary material for: Emplacement of “exotic” Zechstein slivers along the inverted Sontra Graben (northern Hessen, Germany): clues from balanced cross sections and geometrical forward modeling
Source: Copernicus journal article supplement (doi:10.5194/se-12-1005-2021), 2021-04-30
Supplement: Supplementary file 2 [file se-12-1005-2021-supplement.zip › DipData.csv]

latitude	longitude	zone	planeType	dipAzimuth	dip	rockUnit
51.065302	9.981926	32U	Bedding	239	49	mu
51.063814	9.982712	32U	Bedding	205	28	mu
51.061379	9.984028	32U	Bedding	211	11	mu
51.06038	9.985898	32U	Bedding	191	48	mu
51.065982	9.978612	32U	Bedding	198	25	mu
51.064711	9.97699	32U	Bedding	242	26	moT
51.055594	9.979992	32U	Bedding	75	23	mu
51.06791	9.986091	32U	Bedding	157	16	mu
51.067008	9.992341	32U	Bedding	163	19	mu
51.064739	9.987427	32U	Bedding	90	27	mu
51.0647	9.992067	32U	Bedding	160	7	mu
51.063098	9.994297	32U	Bedding	224	23	mu
51.062818	9.992238	32U	Bedding	182	10	mu
51.061705	9.991312	32U	Bedding	50	78	mu
51.062211	9.996356	32U	Bedding	200	14	mu
51.070926	9.959423	32U	Bedding	262	30	z
51.061274	9.948806	32U	Bedding	247	27	z
51.06944	9.943164	32U	Bedding	44	12	z
51.090383	9.943233	32U	Bedding	201	5	su
51.081227	9.95454	32U	Bedding	168	20	sm
51.083649	9.962942	32U	Bedding	98	20	sm
51.083213	9.963432	32U	Bedding	293	10	sm
51.078363	9.952868	32U	Bedding	234	30	mu
51.076876	9.959818	32U	Bedding	196	20	mu
51.07217	9.961233	32U	Bedding	308	7	moT
51.095437	9.908034	32U	Bedding	32	68	mu
51.101728	9.898002	32U	Bedding	183	29	sm
51.110487	9.853566	32U	Bedding	152	45	z
51.111164	9.852794	32U	Bedding	356	37	mu
51.115661	9.853255	32U	Bedding	221	56	z
51.077282	9.948815	32U	Bedding	225	51	mu
51.0626	9.974861	32U	Bedding	28	28	z
51.098238	9.898087	32U	Bedding	347	50	z
51.075384	9.950266	32U	Bedding	39	23	z
51.07406	9.955195	32U	Bedding	52	42	z
51.073682	9.954479	32U	Bedding	10	40	z
51.074732	9.952858	32U	Bedding	354	31	z
51.071003	9.959383	32U	Bedding	94	30	z
51.070464	9.961233	32U	Bedding	69	21	z
51.069551	9.962613	32U	Bedding	56.892197	71.441353	z
51.071209	9.960686	32U	Bedding	21.446354	31.56048	z
51.102156	9.890477	32U	Bedding	203.516998	21.19441	mu
51.1015	9.890091	32U	Bedding	64.008049	40.912617	z
51.100372	9.893944	32U	Bedding	191.100449	26.864347	mu
51.100353	9.893711	32U	Bedding	213.296707	69.056252	mu
51.098288	9.897723	32U	Fault	293.379822	58.13028	z
51.098293	9.89767	32U	Bedding	55.888153	29.752148	z
51.1036	9.86893	32U	Bedding	45.364792	58.767368	z
51.104762	9.866283	32U	Bedding	30.601351	70.703323	z
51.105277	9.865255	32U	Bedding	44.769413	57.870399	z
51.105414	9.864912	32U	Bedding	31.411659	44.691132	z
51.102798	9.873133	32U	Bedding	107.694901	37.984493	z
51.102805	9.873369	32U	Bedding	115.0755	7.925838	z
51.102849	9.873348	32U	Bedding	49.100929	52.651539	z
51.102753	9.873122	32U	Bedding	137.664719	55.843292	z
51.10278	9.873985	32U	Bedding	198.519547	17.943996	z
51.102645	9.873981	32U	Bedding	206.0634	27.398283	z
51.112106	9.853416	32U	Bedding	51	55	mu
51.109747	9.857139	32U	Bedding	71	64	mu
51.108995	9.858203	32U	Bedding	44	45	mu
51.108508	9.86119	32U	Bedding	27.749918	43.44371	z
51.105812	9.873749	32U	Bedding	74.567848	59.292095	mu
51.10591	9.874495	32U	Bedding	32.964664	59.760303	z
51.118741	9.840693	32U	Bedding	154.218369	69.410255	z
51.11869	9.840909	32U	Bedding	358.893921	60.997292	z
51.118689	9.84116	32U	Bedding	13.685697	69.402092	z
51.118688	9.840547	32U	Bedding	242.610901	73.791817	z
51.118348	9.840191	32U	Bedding	167.824509	27.562605	z
51.118362	9.840243	32U	Bedding	166.176758	8.698592	z
51.118383	9.840215	32U	Bedding	154.362534	6.984822	z
51.0828095	9.94022862	32U	Bedding	178	36	mu
51.0820210	9.93917748	32U	Bedding	214	32	su
51.0824398	9.93990567	32U	Bedding	27	57	z
51.0831020	9.94028678	32U	Bedding	215	73	mu
51.0824081	9.93232883	32U	Bedding	8	37	mu
51.0820067	9.93498434	32U	Bedding	250	20	mu
51.0826394	9.92841783	32U	Bedding	9	29	mu
51.0840880	9.92788921	32U	Bedding	0	27	moC
51.0871776	9.94006742	32U	Bedding	208	16	sm
51.0949219	9.94167595	32U	Bedding	270	22	mu
51.0964818	9.93897138	32U	Bedding	111	17	mu
51.0951179	9.93711374	32U	Bedding	111	23	mu
51.0925188	9.93511303	32U	Bedding	180	27	mu
51.0926731	9.93635479	32U	Bedding	133	53	mu
51.0915192	9.93443829	32U	Bedding	203	8	mu
51.0918988	9.93926615	32U	Bedding	268	41	mu
51.1036300	9.94277108	32U	Bedding	115	31	mu
51.1037994	9.94708247	32U	Bedding	134	10	mu
51.0807889	9.91319048	32U	Bedding	18	22	su
51.0838213	9.93615872	32U	Bedding	334	18	mu
51.0825523	9.92551279	32U	Bedding	19	60	mu
51.0835358	9.92115776	32U	Bedding	6	30	mu
51.1042762	9.89557004	32U	Bedding	161	4	sm
51.0943197	9.89197821	32U	Bedding	66	19	sm
51.0992200	9.92788685	32U	Bedding	166	7	sm
51.0934427	9.92001851	32U	Bedding	152	5	mu
51.0929665	9.92194281	32U	Bedding	190	9	mu
51.1033098	9.91856792	32U	Bedding	136	2	sm
51.0955319	9.90719681	32U	Bedding	32	68	mu
51.0948234	9.90826023	32U	Bedding	22	72	mu
51.0850624	9.91774917	32U	Bedding	54	23	mu
